# Supplementary material for: Solvent resistant nanofiltration membranes based on crosslinked polybenzimidazole
Source: Royal Society of Chemistry journal article supplement (doi:10.1039/c5ra27044h), 2016-01-01
Supplement: c5ra27044h1.pdf [file c5ra27044h1.pdf]

## Solvent Resistant Nanofiltration Membranes Based on Crosslinked Polybenzimidazole

Dongju Chen<sup>a\*</sup>, Shanshan Yu<sup>a</sup>, Mei Yang, Dandan Li<sup>a</sup>, Xianfeng Li<sup>b\*</sup>

<sup>a</sup>School of Chemistry and Chemical Engineering, Liaoning Normal University, Huanghe Road 850, Dalian 116029 (P. R. China), Email: dongju.chen@yahoo.com

<sup>b</sup>Division of Energy storage, Dalian Institute of Chemical Physics, Chinese Academy of Science, Zhongshan Road 457, Dalian 116023 (P. R. China), Email: [lixianfeng@dicp.ac.cn](mailto:lixianfeng@dicp.ac.cn)

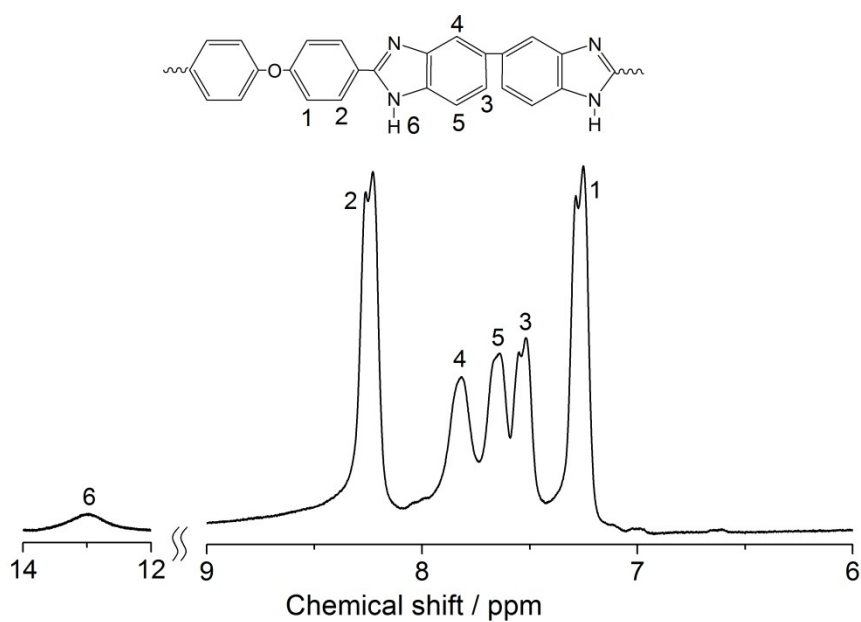

**Figure S1. <sup>1</sup>H-NMR spectrum of the synthesized PBI.**
